# Supplementary material
Source: PubMed Central journal article supplement (PMC4882253)
Supplement: NIHMS779832-supplement-Graphic_abstract.pdf [file NIHMS779832-supplement-Graphic_abstract.pdf]

## Early Atherosclerosis

(Thick lines:  
induced in early  
atherosclerosis)

(Fig. 1) ← Aortic Pla2g4c & Pla2g7↑

Aortic LPC↑

**Aortic  
Endothelial Cell**

Ca<sup>2+</sup>

Ruthenium  
Red

(Fig. 3)

**Mitochondria**

Ca<sup>2+</sup>

(Fig. 4)

Unchanged  
Membrane  
Potential ( $\Delta\Psi_m$ )

Increased  
O<sub>2</sub>  
reduction

Increased  
Proton  
Leak

Unchanged  
ATP  
Synthesis

O<sub>2</sub>

mtROS

MitoTEMPO

(Fig. 2)

AP-1

**Nucleus**  
ICAM-1 and other Endothelial  
Activation Genes (Fig. 5 and 7)

(Fig. 6)

Anterograde  
Signaling

Retrograde  
Signaling

- O<sub>2</sub> reduction
- Proton Leak
- ATP Synthesis

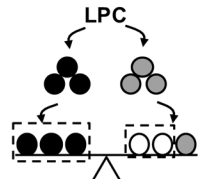

LPC equally induces  
O<sub>2</sub> reduction and  
proton leak.

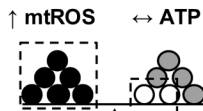

LPC induces mtROS  
by activating electron  
transport chain,  
which is uncoupled  
from ATP synthesis.
