# Supplementary material
Source: PubMed Central journal article supplement (PMC4882253)
Supplement: NIHMS779832-supplement-Supplemental_Figures_and_Tables.pdf [file NIHMS779832-supplement-Supplemental_Figures_and_Tables.pdf]

# Supplemental Figure II

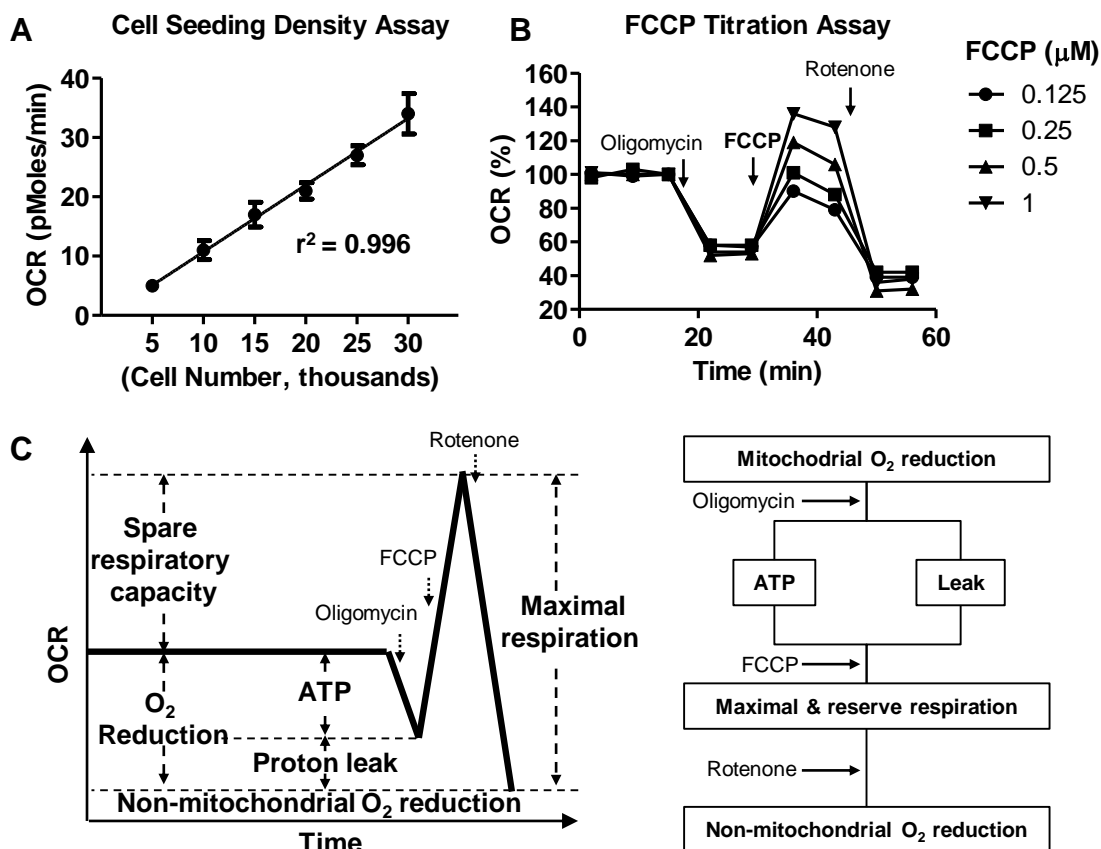

**Supplemental Figure II. Mitochondrial function profiling by Seahorse XF96 analyzer in human aortic endothelial cells (HAECs). A. Linear correlation between cell seeding density and OCR.** Varying densities of HAECs (5,000 cells /well to 30,000 cells /well) were seeded into 96-well plate and oxygen consumption rate (OCR) was measured by Seahorse XF96 Analyzer (n=6 per group). **B. FCCP dose-dependently increased OCR.** After three basal measurements of OCR, XF Mito Stress Test was applied by sequential adding of Oligomycin (1  $\mu$ M), FCCP, and Rotenone (1  $\mu$ M). Different dose of FCCP (0.125  $\mu$ M, 0.25  $\mu$ M, 0.5  $\mu$ M, and 1  $\mu$ M) was added in each group (n=22-24 per group). **C. Schematic representation of how the 6 mitochondrial parameters are determined by Seahorse XF96 analyzer.** For all panels, values represent mean  $\pm$  SEM.

# Supplemental Figure III

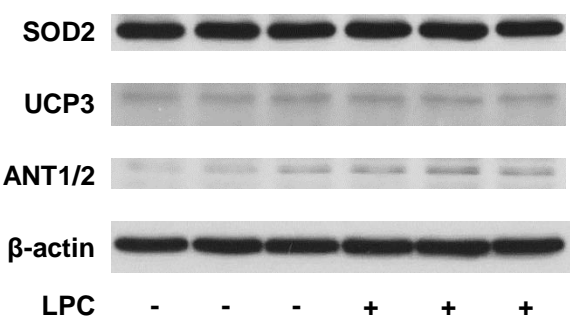

**Supplemental Figure III. The effects of LPC on the expression of mitochondrial antioxidant SOD2 and uncoupling proteins including UCP3 and ANT in human aortic endothelial cells (HAECs).** HAEC were treated with LPC (10 μM) or vehicle control for 18 hours before proteins were collected for Western blot analysis. SOD2, superoxide dismutase 2; UCP3, uncoupling protein 3; ANT1/2, Adenine nucleotide translocator 1/2.

# Supplemental Figure IV

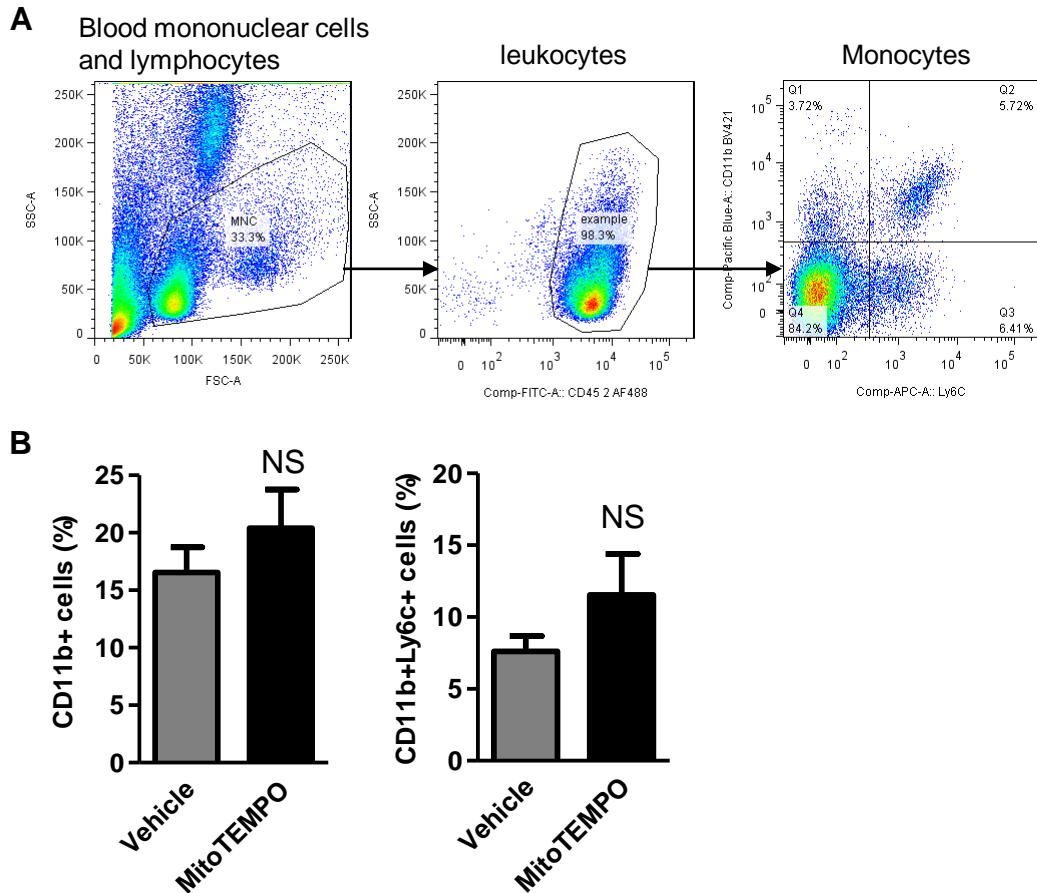

**Supplemental Figure IV. MitoTEMPO does not significantly affect monocyte in the blood.** At eight weeks of age, mini-pumps containing saline or MitoTEMPO (1500  $\mu\text{g}/\text{kg}/\text{day}$ ) were implanted in ApoE<sup>-/-</sup> mice before they were fed with a high fat diet for three weeks. Flow cytometry analyses were carried out afterwards to determine the monocyte numbers in the blood. **A. Gating strategy of blood monocyte by flow cytometry.** **B. MitoTEMPO did not affect blood monocyte numbers.** Percentages of CD11b<sup>+</sup> total monocytes (Q1+Q2 in panel B) and CD11b<sup>+</sup>Ly6c<sup>+</sup> inflammatory monocytes (Q2 in panel B) in CD45<sup>+</sup> blood leukocyte cell population between the two groups were shown (n=7-9 mice per group). Values represent mean  $\pm$  SEM. NS, not significant.

# Supplemental Table I

| Gene<br>Symbol                   | ApoE <sup>-/-</sup> vs WT |            |
|----------------------------------|---------------------------|------------|
|                                  | FC                        | P value    |
| Pla2g7<br>(Lp-PLA <sub>2</sub> ) | 1.94                      | 0.012      |
| Pla2g4c                          | 1.42                      | 0.016      |
| Pla2g5                           | 1.32                      | 0.075      |
| Pla2g3                           | 1.06                      | 0.699      |
| Pla2g1b                          | 1.05                      | 0.653      |
| Pla2g2d                          | 1.04                      | 0.872      |
| Pla2g2e                          | 1.04                      | 0.801      |
| Pla2g4b                          | 1.02                      | 0.858      |
| Pla2g4d                          | 1.02                      | 0.903      |
| Pla2g2f                          | 1.01                      | 0.957      |
| Pla2g4f                          | 1                         | 0.991      |
| Pla2g12a                         | 1                         | 0.984      |
| Pla2g10                          | 0.98                      | 0.886      |
| Pla2g6                           | 0.97                      | 0.721      |
| Pla2g2c                          | 0.89                      | 0.434      |
| Pla2g12b                         | 0.89                      | 0.284      |
| Pla2g2a                          | 0.88                      | 0.392      |
| Pla2g4e                          | 0.86                      | 0.075      |
| Pla2g4a                          | 0.83                      | 0.073      |
| Housekeeping<br>genes {          | Actb                      | 0.97 0.463 |
|                                  | Gapdh                     | 0.97 0.761 |
|                                  | Nono                      | 1.06 0.296 |

**Supplemental Table I. LPC processing enzyme Pla2g4c and Pla2g7 are significantly induced in the aortas during early atherosclerosis.** Fold change (FC) and statistic *P* value of expression changes of phospholipase A2 superfamily members and three housekeeping genes (*Actb*, *Gapdh*, and *Nono*) between apolipoprotein E knockout (ApoE<sup>-/-</sup>) and wild-type (WT) mice fed with 3 weeks of high fat diet were shown (n=5). LP-PLA<sub>2</sub>, lipoprotein-associated phospholipase A2. ApoE<sup>-/-</sup>, apolipoprotein E knockout mice; WT, wild-type mice; FC, fold change. PLA2 family enzymes that were significantly induced were highlighted.

# Supplemental Table II

| Gene Name | Fold change (LPC vs control) | Fold change (LPC + MT vs control) |
|-----------|------------------------------|-----------------------------------|
| PLAT      | 6.9653                       | 1.9204                            |
| NOS3      | 3.5738                       | 2.2601                            |
| TEK       | 2.7487                       | 1.6439                            |
| PTGIS     | 2.3309                       | 1.4531                            |
| THBD      | 1.792                        | 1.4466                            |
| BCL2L1    | 1.6958                       | 1.9524                            |
| ACE       | 1.6474                       | 1.3946                            |
| COL18A1   | 1.5245                       | 1.8763                            |
| VEGFA     | 1.512                        | 1.756                             |
| CDH5      | 1.4943                       | 1.5694                            |
| CASP3     | 1.449                        | 1.1829                            |
| SERPINE1  | 1.449                        | 1.5977                            |
| PTGS2     | 1.4457                       | 1.1202                            |
| KDR       | 1.4453                       | 1.3329                            |
| FLT1      | 1.4402                       | 1.3048                            |
| HMOX1     | 1.4375                       | 1.531                             |
| IL6       | 1.4236                       | 1.043                             |
| KIT       | 1.4021                       | 1.8298                            |
| PROCR     | 1.3998                       | 1.3774                            |
| IL7       | 1.3771                       | 1.2878                            |
| FAS       | 1.3546                       | 1.1762                            |
| ADAM17    | 1.3173                       | 1.1737                            |
| TIMP1     | 1.3151                       | 1.3525                            |
| VWF       | 1.3127                       | 1.2311                            |
| ICAM1     | 1.3005                       | 0.9859                            |
| TGFB1     | 1.2946                       | 1.2359                            |
| ITGA5     | 1.2933                       | 1.2661                            |
| PTK2      | 1.2757                       | 1.3421                            |
| CFLAR     | 1.249                        | 1.4001                            |
| MMP2      | 1.2393                       | 1.0168                            |
| ITGB3     | 1.2388                       | 1.1837                            |
| BAX       | 1.234                        | 1.3792                            |
| F2R       | 1.224                        | 1.1042                            |
| FGF2      | 1.2057                       | 1.2843                            |
| HIF1A     | 1.1875                       | 1.2849                            |
| PECAM1    | 1.1809                       | 1.1546                            |
| ITGB1     | 1.1714                       | 1.204                             |
| SPHK1     | 1.1669                       | 1.3976                            |
| ENG       | 1.1666                       | 0.6155                            |
| FN1       | 1.1474                       | 1.1297                            |
| PLAU      | 1.1415                       | 0.9469                            |
| ITGAV     | 1.1275                       | 1.0781                            |
| ANXA5     | 1.0928                       | 1.1302                            |
| TNFSF10   | 1.0798                       | 1.2652                            |
| MMP1      | 1.068                        | 0.6514                            |
| TFPI      | 1.0469                       | 1.2842                            |
| PGF       | 1.0161                       | 1.0273                            |
| CASP1     | 1.0134                       | 0.8812                            |
| EDN1      | 1.0085                       | 1.0771                            |
| OCLN      | 0.9929                       | 1.0649                            |
| CAV1      | 0.9839                       | 0.7808                            |
| SOD1      | 0.9183                       | 1.3463                            |
| THBS1     | 0.9016                       | 0.8662                            |
| VCAM1     | 0.8992                       | 0.9438                            |
| SELE      | 0.735                        | 0.692                             |
| CCL2      | 0.7212                       | 0.771                             |
| F3        | 0.5965                       | 0.4462                            |

**Supplemental Table II. LPC-induced mtROS contribute to endothelial activation.** HAECs were treated with vehicle, LPC (10  $\mu$ M), LPC (10  $\mu$ M) plus MitoTEMPO (1  $\mu$ M) for 6 hours and RNAs were collected for Human EC Biology PCR array (QIAGEN) analysis. Fold changes of gene expression between LPC versus control and LPC plus MitoTEMPO (MT) versus control were shown. Pooled samples (n=3) in each group. The PCR array was repeated once with similar results.

## Supplemental Table III

| Gene   | PMID<br>(AP-1 target) | PMID<br>(ROS target) |
|--------|-----------------------|----------------------|
| ICAM1  | 8834767               | 8958136              |
| PLAT   | 19088796              | 21468253             |
| IL6    | 11098847              | 10564193             |
| MMP2   | 12371906              | 11223425             |
| PTGS2  | 10825375              | 20826536             |
| CASP3  | N.F.                  | 9840939              |
| PTGIS  | N.F.                  | N.F.                 |
| TEK    | N.F.                  | N.F.                 |
| F2R    | N.F.                  | 25994290             |
| FAS    | N.F.                  | 12504821             |
| NOS3   | 20371606              | 12569550             |
| ACE    | 12433834              | 18227481             |
| ADAM17 | N.F.                  | 19846666             |
| THBD   | 20472895              | 23844043             |

**Supplemental Table III. LPC contributes to endothelial activation by upregulating AP-1 and ROS.** The genes that were induced by LPC but inhibited by mtROS inhibitor (Figure 5A) were also found to be AP-1 and ROS targets in previous studies. Pubmed IDs (PMIDs) which reported the relationship between these genes and AP-1/ROS were shown in the table. N.F., not found.
